# Supplementary material for: Stabilizing the B-site oxidation state in ABO3 perovskite nanoparticles
Source: Royal Society of Chemistry journal article supplement (doi:10.1039/c9nr04155a), 2019-01-01
Supplement: c9nr04155a1.pdf [file c9nr04155a1.pdf]

## **Electronic Supporting Information for**

### **Stabilizing the B-site Oxidation State in $\text{ABO}_3$ Perovskite Nanoparticles**

Tochukwu Ofoegbuna,<sup>a</sup> Pragathi Darapaneni,<sup>a</sup> Smriti Sahu,<sup>a</sup> Craig Plaisance<sup>a</sup> and James A. Dorman <sup>\*a</sup>

<sup>a</sup> Cain Department of Chemical Engineering, Louisiana State University, Baton Rouge, Louisiana 70803, United States.

\* Corresponding Author

Email: jamesdorman@lsu.edu.

## Experimental

Fourier-transform infrared (FTIR) spectroscopy was performed on the as-synthesized SNO (Sr/Nb=1.3) NPs using a Bruker Tensor 27 FT-IR spectrometer equipped with a DTGS detector, KBr beamsplitter, and MIRacle single reflection diamond/ZnSe attenuated total reflectance cell. The spectra were collected by averaging 128 scans in the range of 4000 to 400  $\text{cm}^{-1}$  and with a resolution of 4  $\text{cm}^{-1}$ .

In order to measure the Sr and Nb concentrations, a Perkins Elmer Optima 8000 inductively coupled plasma optical emission spectrometer (ICP-OES) equipped with an auto sampler was used. Samples for ICP-OES analysis were prepared by digesting 9 mg of the SNO NPs in a  $\text{HNO}_3$  (MiliporeSigma, 65%) and HCl (VWR BDH Chemicals, 38%) solution which is heated to  $\sim 90^\circ\text{C}$ . Next, the digested sample is diluted to 10 ppm using 2%  $\text{HNO}_3$ .

Iodometric titration was performed to investigate the oxygen vacancy concentration ( $\delta$ ) in the Sr-deficient lattice. Briefly, 9 mg of SNO (Sr/Nb=1.3) NPs were dissolved in 3 mL of 2 M KI (VWR BDH Chemicals, ACS) solution and degassed with flowing  $\text{N}_2$  for 5 min in an Erlenmeyer flask. Next, 25 mL of 1 M  $\text{HNO}_3$  (MiliporeSigma, 65%) was added to the mixture under vigorous stirring. 0.1 M  $\text{Na}_2\text{S}_2\text{O}_3$  (Spectrum Chemical Mfg. Corp., anhydrous  $\geq 97\%$ ), which was standardized against  $\text{H}_2\text{O}_2$  (VWR BDH Chemicals, 3%), was titrated into the solution under inert conditions. The endpoint of the titration is detected using a starch indicator. The titration was repeated three times for the SNO sample and a blank titration (no sample) was performed to subtract atmospheric oxygen contribution.

A combination of Rietveld Refinement and O 1s XPS analysis was also utilized in calculating the  $\delta$ . Rietveld refinement was performed assuming no oxygen vacancies in the Sr-deficient phase. From the deconvoluted O 1s spectrum, the peak area and ratios for the Stoichiometric and Sr-deficient lattice were extracted. The ratio extracted from the O 1s spectrum compared to the Rietveld refinement for the Sr-deficient phase was smaller due to the presence of oxygen vacancies. In order to quantify the oxygen vacancy concentration, the ratio of the O 1s spectrum was corrected using the Rietveld refinement ratios (in mol%). During the correction, the area under the Stoichiometric peak was held constant and the Sr-deficient peak area was allowed to change until the area ratio matched that of the ratio acquired from Rietveld Refinement. The increase in the Sr-deficient phase peak area is attributed to the filling of oxygen vacancy sites. For this reason, the oxygen vacancy area is the difference between the Rietveld refinement and the O 1s spectrum, and the oxygen vacancy concentration is the ratio of oxygen vacancy to oxygen in the Sr-deficient lattice.

## Figures

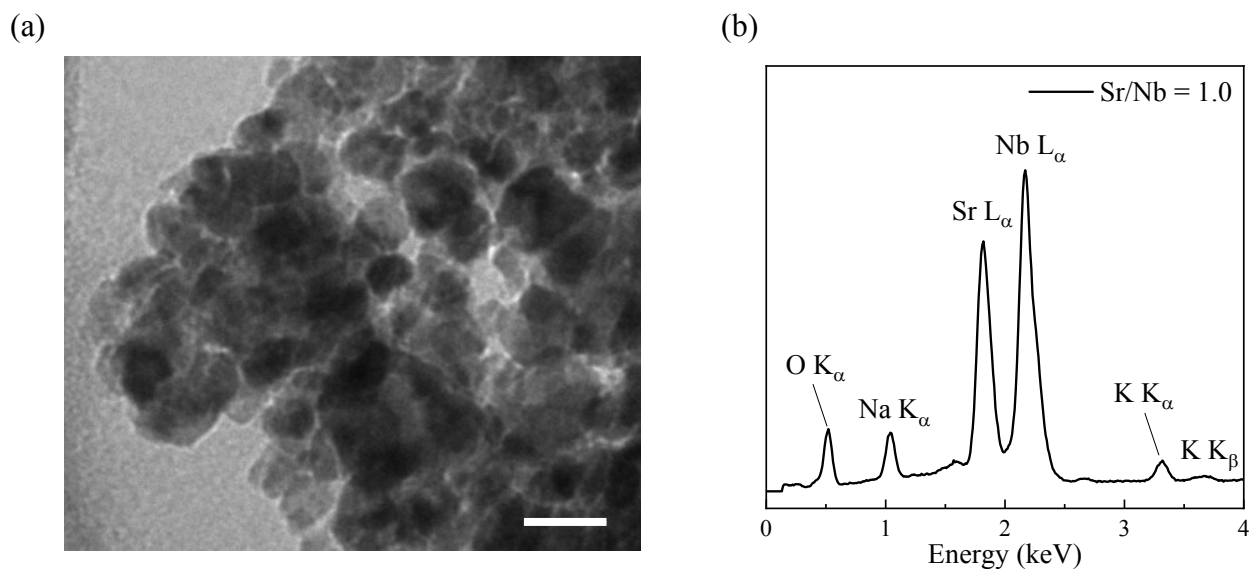

**Figure S1.** (a-b) TEM/ EDX of the  $\text{Sr}_{1-x}\text{NbO}_{3-\delta}$  ( $\text{Sr}/\text{Nb}=1.0$ ) nanoparticles synthesized under total pressure of 0.2 Torr. Nanoparticle sizes are approximately 10 to 20 nm. The scale bar in the TEM image is 50 nm.

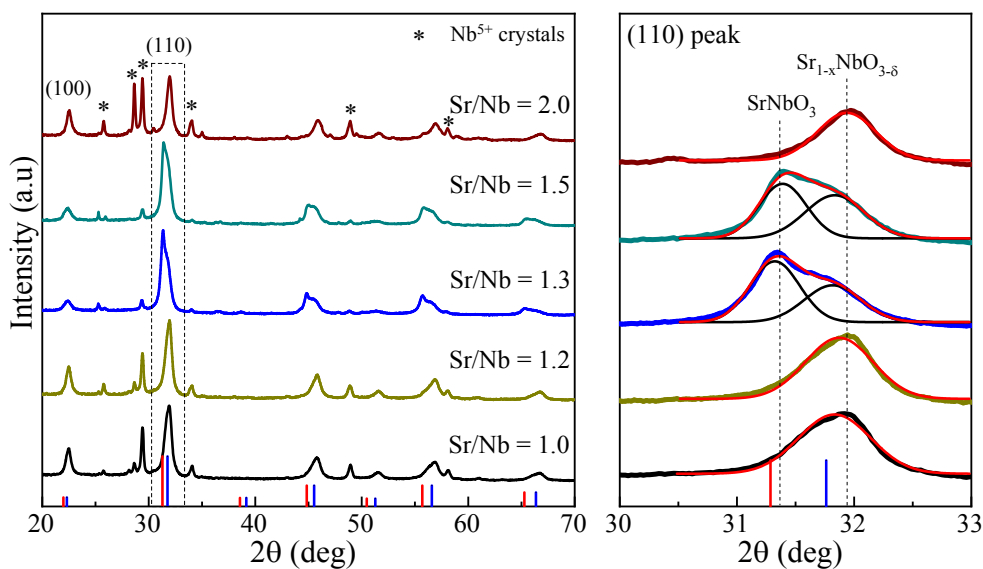

**Figure S2.** Concentration dependence of  $\text{Sr}_{1-x}\text{NbO}_{3-\delta}$  ( $\text{Sr}/\text{Nb}=1.0, 1.2, 1.3, 1.5$ , and  $2.0$ ) diffraction pattern (left) and an expanded view (right) of the diffraction pattern from  $2\theta = 30^\circ - 33^\circ$  highlighting change in peak position with increasing Sr concentration. The dashed lines are a guide to the eye for phase identification.

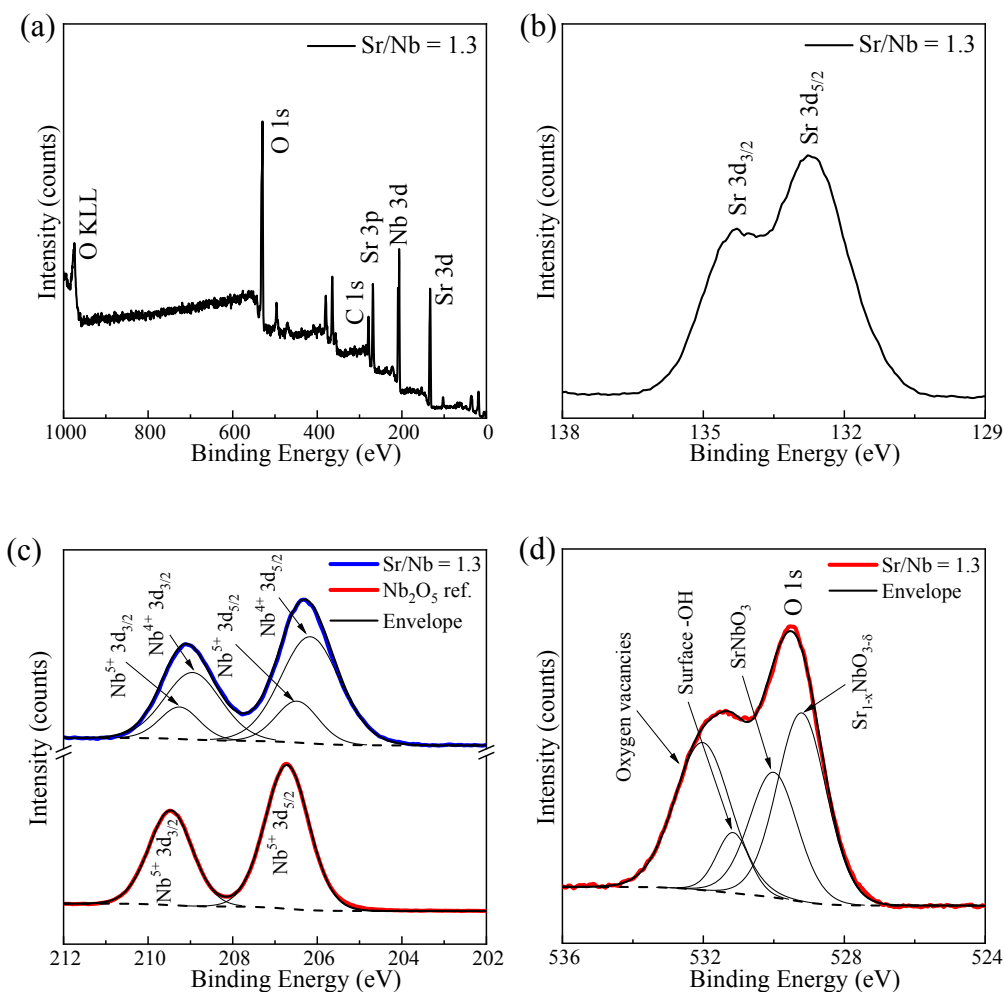

**Figure S3.** XPS (a) survey scan, (b) Sr 3d spectrum, and (c-d) spectra deconvolution for Nb 3d and O 1s in  $\text{Sr}_{1-x}\text{NbO}_{3-\delta}$  ( $\text{Sr/Nb}=1.3$ ) nanoparticles synthesized under total pressure of 0.2 Torr. Nb 3d scan shows two visible oxidation states for niobium, Nb<sup>5+</sup> (minority species, ~23%) and Nb<sup>4+</sup> (majority species, ~77%). Peaks due to lattice oxygens ( $\text{SrNbO}_3$ ,  $\text{Sr}_{0.7}\text{NbO}_{3-\delta}$ ), surface hydroxyl groups, and oxygen vacancies are visible in the O 1s scan.

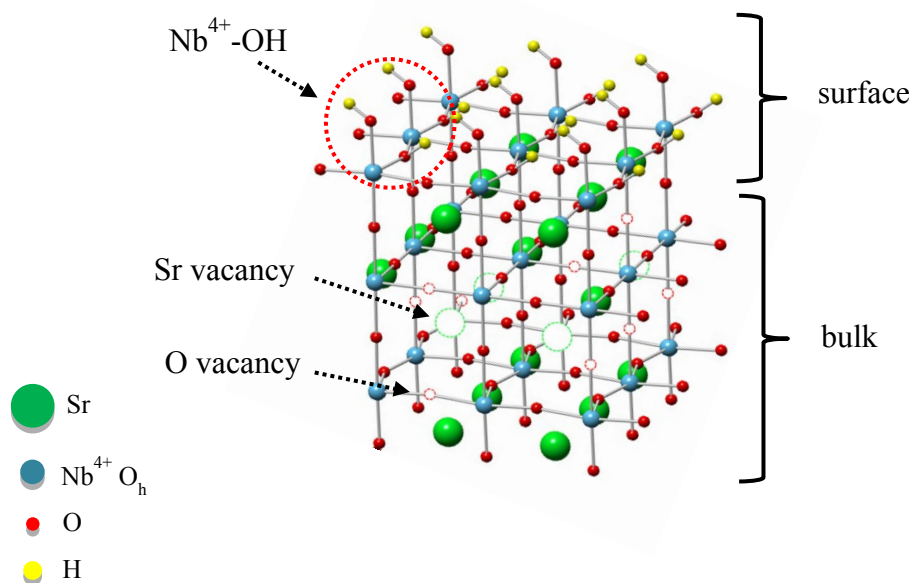

**Figure S4.** Schematic representation of the  $\text{Sr}_{1-x}\text{NbO}_3$  crystal. The model is presented in ball and stick form to highlight the presence of  $\text{Nb}^{4+}\text{-OH}$  groups on the surface and point defects (Sr and O vacancies) in the bulk of the nanoparticle.

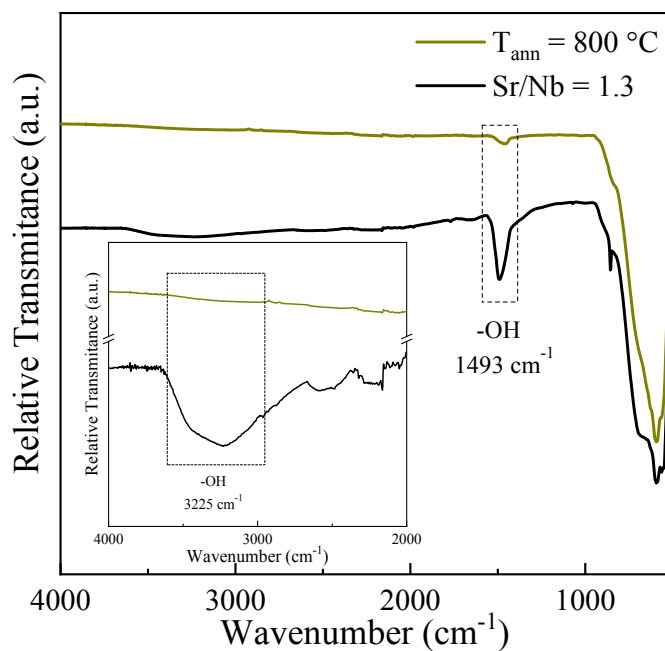

**Figure S5.** FTIR spectra for as-synthesized and  $\text{H}_2/\text{Ar}$  annealed  $\text{Sr}_{1-x}\text{NbO}_{3-\delta}$  ( $\text{Sr/Nb}=1.3$ ) NPs. The peaks ascribed to hydroxyl groups, positioned at 1493 and 3225 ( $\text{cm}^{-1}$ , inset), are significantly reduced after the annealing process.

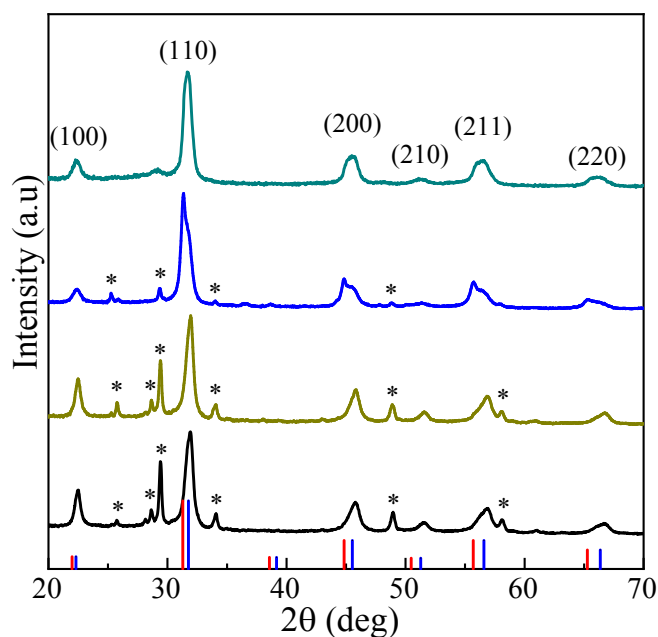

**Figure S6.** Diffraction patterns for as-synthesized  $\text{Sr}_{1-x}\text{NbO}_{3-\delta}$  ( $\text{Sr}/\text{Nb}=1.0, 1.2$ , and  $1.3$ ) and  $\text{H}_2/\text{Ar}$  annealed  $\text{Sr}_{1-x}\text{NbO}_{3-\delta}$  ( $\text{Sr}/\text{Nb}=1.3$ ) NPs. The diffraction patterns highlight the absence of the  $\text{Nb}^{5+}$  crystals after the  $\text{H}_2/\text{Ar}$  annealing process.

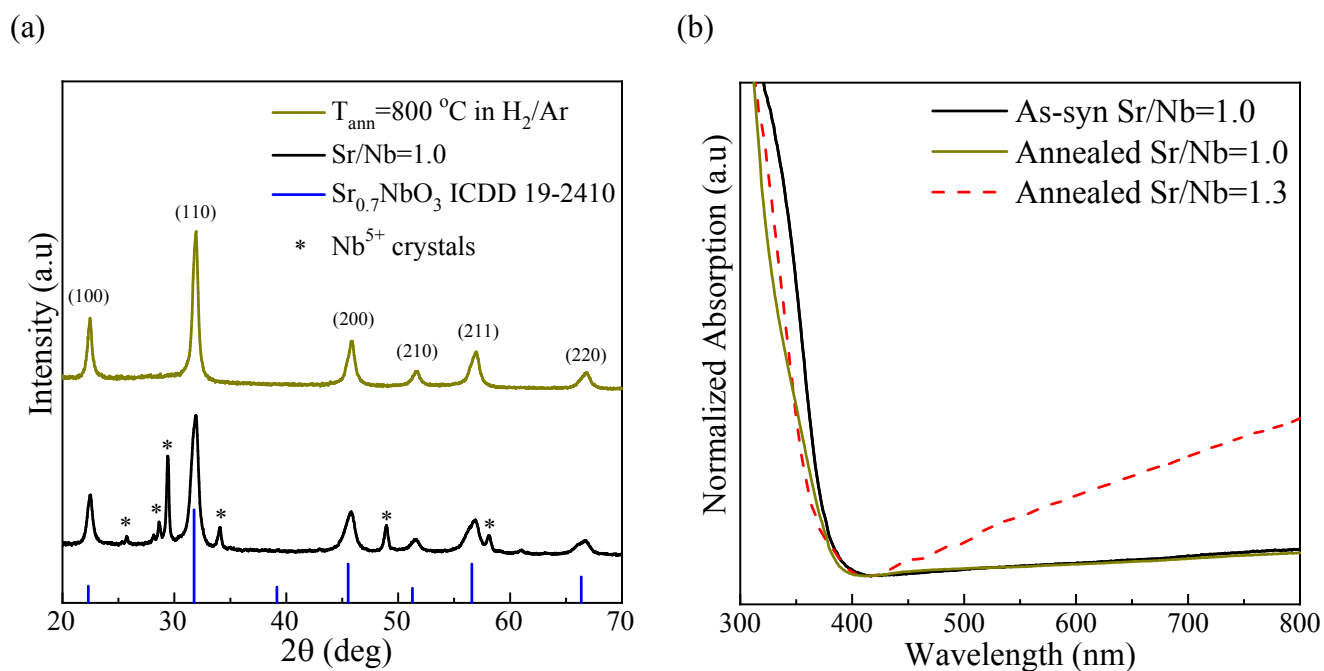

**Figure S7.** (a) Diffraction patterns and (b) optical absorption spectra for as-synthesized and  $\text{H}_2/\text{Ar}$  annealed  $\text{Sr}_{1-x}\text{NbO}_{3-\delta}$  ( $\text{Sr}/\text{Nb}=1.0$ ) NPs. The diffraction patterns highlight the absence of the  $\text{Nb}^{5+}$  crystals and the absorption spectra show no significant change in the absorption after the annealing process.

## Tables

**Table S1.** ICP-OES Analysis on Sr/Nb=1.3

| Sr/Nb = 1.3<br>Sample | ICP-OES (mg/L)                       | ICP-OES (mmol/L)                     | ICP-OES<br>(mol%)    | SrNbO <sub>3</sub> / Sr <sub>0.7</sub> NbO <sub>3</sub><br>(mol%) |
|-----------------------|--------------------------------------|--------------------------------------|----------------------|-------------------------------------------------------------------|
| Trial #1              | Sr (2.235)<br>Nb (2.476)             | Sr (0.026)<br>Nb (0.027)             | Sr (49%)<br>Nb (51%) | Sr (46%)<br>Nb (54%)                                              |
| Trial #2              | Sr (2.480)<br>Nb (2.750)             | Sr (0.028)<br>Nb (0.030)             | Sr (49%)<br>Nb (51%) | -                                                                 |
| Trial #3              | Sr (2.676)<br>Nb (2.967)             | Sr (0.031)<br>Nb (0.032)             | Sr (49%)<br>Nb (51%) | -                                                                 |
| Average               | Sr (2.464±0.221)<br>Nb (2.731±0.250) | Sr (0.028±0.003)<br>Nb (0.029±0.003) | Sr (49%)<br>Nb (51%) | -                                                                 |

**Table S2.** Refined Atomic

Coordinates and Structural

Parameters at Room  
based on X-ray Diffraction

| Parameters            | SrNbO <sub>3</sub> | Sr <sub>0.7</sub> NbO <sub>3</sub> |
|-----------------------|--------------------|------------------------------------|
| Atomic Coordinates    |                    |                                    |
| Sr (x,y,z)            | 0, 0, 0            | 1/2, 1/2, 1/2                      |
| Nb (x,y,z)            | 1/2, 1/2, 1/2      | 0, 0, 0                            |
| O (x,y,z)             | 0, 1/2, 1/2        | 1/2, 0, 0                          |
| Structural Parameters |                    |                                    |
| Sr-O (Å)              | 2.858(7)           | 2.816(2)                           |
| Nb-O (Å)              | 2.021(4)           | 1.991(4)                           |
| O-Nb-O (deg)          | 180                | 180                                |
| O-Nb-O (deg)          | 90                 | 90                                 |
| Nb-O-Nb (deg)         | 180                | 180                                |

Temperature for Sr/Nb=1.3  
Data.

The occupancy was fixed to 1 at all atom sites for the SrNbO<sub>3</sub> structure and to 0.7 at the Sr site and 1 at Nb and O sites for the Sr<sub>0.7</sub>NbO<sub>3</sub> structure. For the SrNbO<sub>3</sub>, the isotropic displacement parameter  $U_{iso}$  is 0.036(2), 0.002(9), and 0.045(1) Å<sup>2</sup> for Sr, Nb, and O sites, respectively. For the Sr<sub>0.7</sub>NbO<sub>3</sub>, the isotropic displacement parameter  $U_{iso}$  is 0.016(4), 0.005(5), and 0.001(8) Å<sup>2</sup> for Sr, Nb, and O sites, respectively.

**Table S3.** Detailed Calculation for  $\delta$  based on Rietveld Refinement and O 1s XPS Spectrum for Sr/Nb=1.3.

| Phase          | O 1s XPS  |            | Rietveld Refinement |            | Oxygen Vacancy |            |
|----------------|-----------|------------|---------------------|------------|----------------|------------|
|                | Peak Area | Area Ratio | Peak Area           | Area Ratio | Peak Area      | Area Ratio |
| Stoichiometric | 35,859.54 | 0.61       | 35,859.54           | 0.50       | -              | -          |
| Sr-deficient   | 23,308.70 | 0.39       | 35,841.99           | 0.50       | 12,533.29      | 0.35       |
| Total          | 59,168.24 |            | 71,701.53           |            |                |            |

**Table S4.** Comparison of SNO (Sr/Nb=1.3) Raman Spectrum and Experimental SrTiO<sub>3</sub> Frequencies.

| Phonon Branch   | Symmetry        | Experimental Frequency (cm <sup>-1</sup> ) | Published work on SrTiO <sub>3</sub> (cm <sup>-1</sup> ) <sup>a,b</sup> |
|-----------------|-----------------|--------------------------------------------|-------------------------------------------------------------------------|
| TO <sub>1</sub> | F <sub>1u</sub> | 129                                        | 118                                                                     |
| LO <sub>1</sub> | F <sub>1u</sub> | 138                                        | 175                                                                     |
| TO <sub>2</sub> | F <sub>1u</sub> | 260                                        | 185                                                                     |
| LO <sub>2</sub> | F <sub>1u</sub> | 433                                        | 475                                                                     |
| TO <sub>4</sub> | F <sub>1u</sub> | 556                                        | 550                                                                     |
| LO <sub>4</sub> | F <sub>1u</sub> | 821                                        | 795                                                                     |

<sup>a,b</sup> Experimental Raman scattering data from refs 66 and 67

## Iodometric Titration Calculation

### Standardization of Na<sub>2</sub>S<sub>2</sub>O<sub>3</sub> solution

Prepare 30 mL of 0.04 M H<sub>2</sub>O<sub>2</sub> (1.2 mmol) which yields 2.4 mmol of Na<sub>2</sub>S<sub>2</sub>O<sub>3</sub> (equation S1 and S2). From the titration, 31 mL of Na<sub>2</sub>S<sub>2</sub>O<sub>3</sub> is utilized. Therefore, the actual concentration of Na<sub>2</sub>S<sub>2</sub>O<sub>3</sub> is 0.08 M.

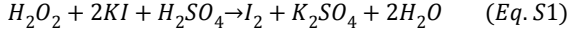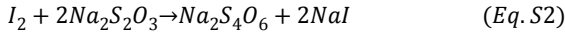

### Oxygen Vacancy Calculation from Na<sub>2</sub>S<sub>2</sub>O<sub>3</sub> titration

The oxygen vacancy is calculated based on a recent report<sup>1</sup> and adapted as followed with the chemical formula for the Sr-deficient phase, from Rietveld analysis, determined as:  $Sr_{0.7}^{2+}Nb_{(1-\alpha-\beta)}^{4+}Nb_{\alpha}^{5+}Nb_{\beta}^{3+}O_{3-\delta}$

Applying charge neutrality conditions to correlate  $\delta$  to  $\alpha$  and  $\beta$ :

$$\delta = 0.3 - \frac{1}{2}\alpha + \frac{1}{2}\beta \quad (Eq. S3)$$

Dissolving sample in HNO<sub>3</sub> and reacting with KI:

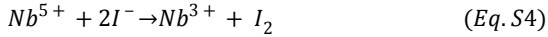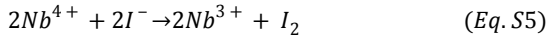

Reaction for Iodine titration with a standard Na<sub>2</sub>S<sub>2</sub>O<sub>3</sub> solution:

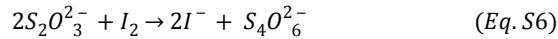

Concentration of formed I<sub>2</sub>: from the titration, where C is the concentration (mmol/mL) and V is the volume (mL) of the Na<sub>2</sub>S<sub>2</sub>O<sub>3</sub> solution:

$$[I_2] = [Nb^{5+}] + 0.5[Nb^{4+}] \quad (Eq. S7)$$

$$[I_2] = \frac{1}{2}CV \quad (Eq. S8)$$

Molar mass of Sr<sub>0.7</sub>NbO<sub>3-δ</sub> (*M*) is a function of the molar mass of Sr<sub>0.7</sub>NbO<sub>3</sub> (*M<sub>o</sub>*, 228.53 mg/mmol), oxygen (*m<sub>1</sub>*, 16 mg/mmol), and  $\delta$ :

$$M = M_o - m_1\delta \quad (Eq. S9)$$

Rewriting equation S5 in terms of  $\alpha$  and  $\beta$  and combining with S6, *m* is the mass of Sr<sub>0.7</sub>NbO<sub>3-δ</sub> sample:

$$\frac{1}{2}CV = \alpha\left(\frac{m}{M}\right) + 0.5(1 - \alpha - \beta)\left(\frac{m}{M}\right) \quad (Eq. S10)$$

Substituting equation S3 and S9 into S10:

$$\frac{1}{2}CV = (0.8 - \delta)\left(\frac{m}{M_o - m_1\delta}\right) \quad (Eq. S11)$$

Finally, solving for  $\delta$  from equation S11:

$$\delta = \left(\frac{M_o CV - 1.6m}{m_1 CV - 2m}\right)$$

The blank experiment shows slight  $I_2$  formation due to the presence of atmospheric oxygen. Therefore, to eliminate atmospheric contribution 0.1 mL (or 0.008 mmol) was subtracted from the final titration volumes of Trial 1-3 and displayed in Table S5. The oxygen non-stoichiometry is calculated using  $m = 9$  mg and  $C = 0.08$  M (from above).

**Table S5.** Titration Results

| Experiment | Volume $Na_2S_2O_3$<br>(V, mL) | Mole $Na_2S_2O_3$<br>(CV, mmol) | $\delta$        |
|------------|--------------------------------|---------------------------------|-----------------|
| Blank      | 0.100                          | 0.008                           | -               |
| Trial #1   | 0.500                          | 0.040                           | 0.30            |
| Trial #2   | 0.400                          | 0.032                           | 0.41            |
| Trial #3   | 0.400                          | 0.032                           | 0.41            |
| Average    | $0.433 \pm 0.058$              | $0.035 \pm 0.005$               | $0.37 \pm 0.06$ |

## References

1. Y. Wang, L. Chen, H. Cao, Z. Chi, C. Chen, X. Duan, Y. Xie, F. Qi, W. Song and J. Liu, *Appl. Catal. B*, 2019, **245**, 546-554.
